# Supplementary material for: Thermo-reversible capture and release of DNA by zwitterionic surfactants
Source: Royal Society of Chemistry journal article supplement (doi:10.1039/c6sm00704j), 2016-01-01
Supplement: c6sm00704j1.pdf [file c6sm00704j1.pdf]

**Supporting Information for**

**Thermo-Reversible Capture and Release of DNA by  
Zwitterionic Surfactants**

Lei Feng, Lu Xu, Shuli Dong, and Jingcheng Hao\*

*Key Laboratory of Colloid and Interface Chemistry & Key Laboratory of Special  
Aggregated Materials, Shandong University, Ministry of Education, Jinan 250100,  
China.*

\* To whom correspondence should be addressed.

E-mail: [jhao@sdu.edu.cn](mailto:jhao@sdu.edu.cn); Tel: +86-531-88366074. Fax: +86-531-88564750.

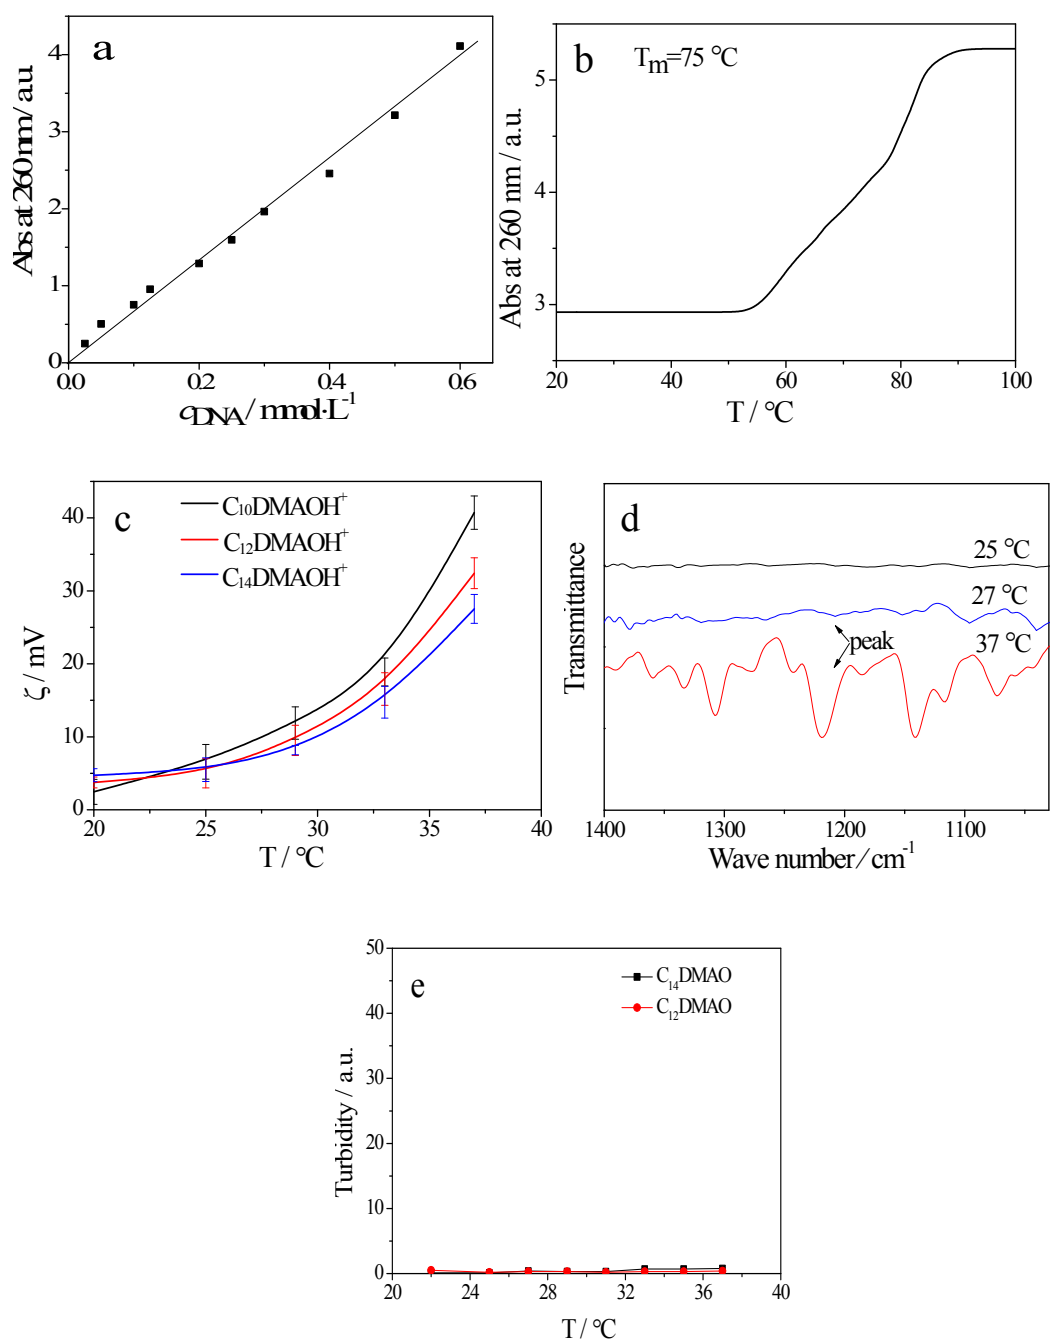

**Figure S1.** a) Variation of the intensity of the absorbance at 260 nm of DNA as a function in tris-HCl buffer solution with a pH of 6.8 at 25  $^\circ\text{C}$ ; b) melting curves obtained in the presence of a tris-HCl buffer solution, pH=6.8,  $c_{DNA} = 0.5 \text{ mmol} \cdot \text{L}^{-1}$ ; c) Variation of zeta-potential ( $\zeta$ ) for  $\text{C}_n\text{DMAOH}^+$  samples with varying temperatures, samples of  $\text{C}_{14}\text{DMAO}$ ,  $\text{C}_{12}\text{DMAO}$  and  $\text{C}_{10}\text{DMAO}$  were prepared using tris-HCl buffer solutions with pH = 7.2, 6.8 and 6.6, respectively; d) FT-IR spectra of

C<sub>14</sub>DAMO in tris-HCl solutions at different temperatures; e) Turbidity of C<sub>14</sub>DAMO and C<sub>12</sub>DAMO in tris-HCl solutions at different temperatures.

Table 1. cmcs of C<sub>n</sub>DMAO in tris-HCl buffer solutions.

|                      | <sup>a</sup> cmc          | <sup>b</sup> cmc         | <sup>c</sup> cmc         |
|----------------------|---------------------------|--------------------------|--------------------------|
| C <sub>10</sub> DMAO | 6 mmol·L <sup>-1</sup>    | 10 mmol·L <sup>-1</sup>  | 15 mmol·L <sup>-1</sup>  |
| C <sub>12</sub> DMAO | 0.9 mmol·L <sup>-1</sup>  | 1.6 mmol·L <sup>-1</sup> | 4 mmol·L <sup>-1</sup>   |
| C <sub>14</sub> DMAO | 0.25 mmol·L <sup>-1</sup> | 0.4 mmol·L <sup>-1</sup> | 0.6 mmol·L <sup>-1</sup> |

Samples of C<sub>14</sub>DMAO, C<sub>12</sub>DMAO and C<sub>10</sub>DMAO were prepared using tris-HCl buffer solutions with pH = 7.2, 6.8 and 6.6, respectively.

<sup>a</sup> CMC: The onset concentration for the change of  $I_1/I_3$  ratio

<sup>b</sup> CMC: The mid-point concentration for the change of  $I_1/I_3$  ratio

<sup>c</sup> CMC: The leveling off concentration for the change of  $I_1/I_3$  ratio

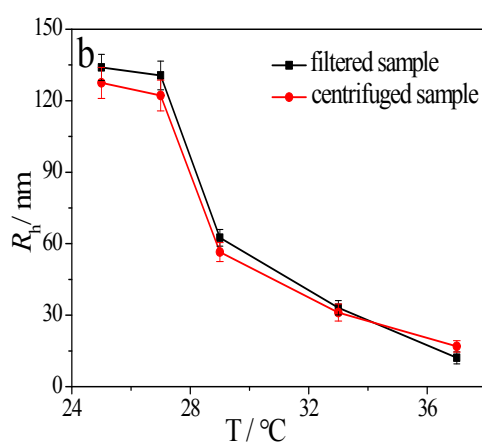

**Figure S2.** A comparison in hydrodynamic radii ( $R_h$ ) of DNA/C<sub>12</sub>DMAO system at different temperatures for the filtered and centrifuged samples.  $c_{\text{DNA}} = 0.5 \text{ mmol}\cdot\text{L}^{-1}$  and  $R = 20$ .

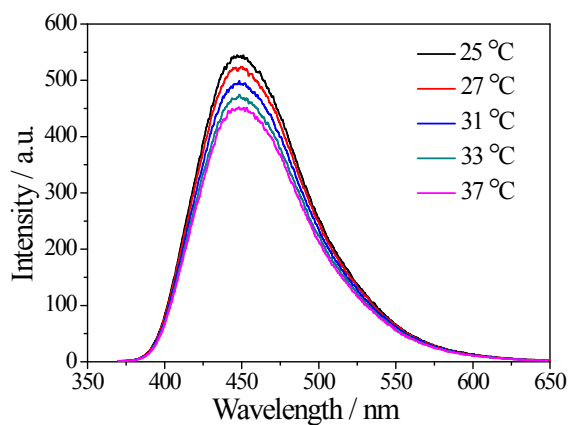

**Figure S2.** Fluorescence spectra of 0.5 mmol·L<sup>-1</sup> DNA in tris-HCl buffer solution at different temperatures. The samples were prepared using tris-HCl buffer solution with pH = 7.2.

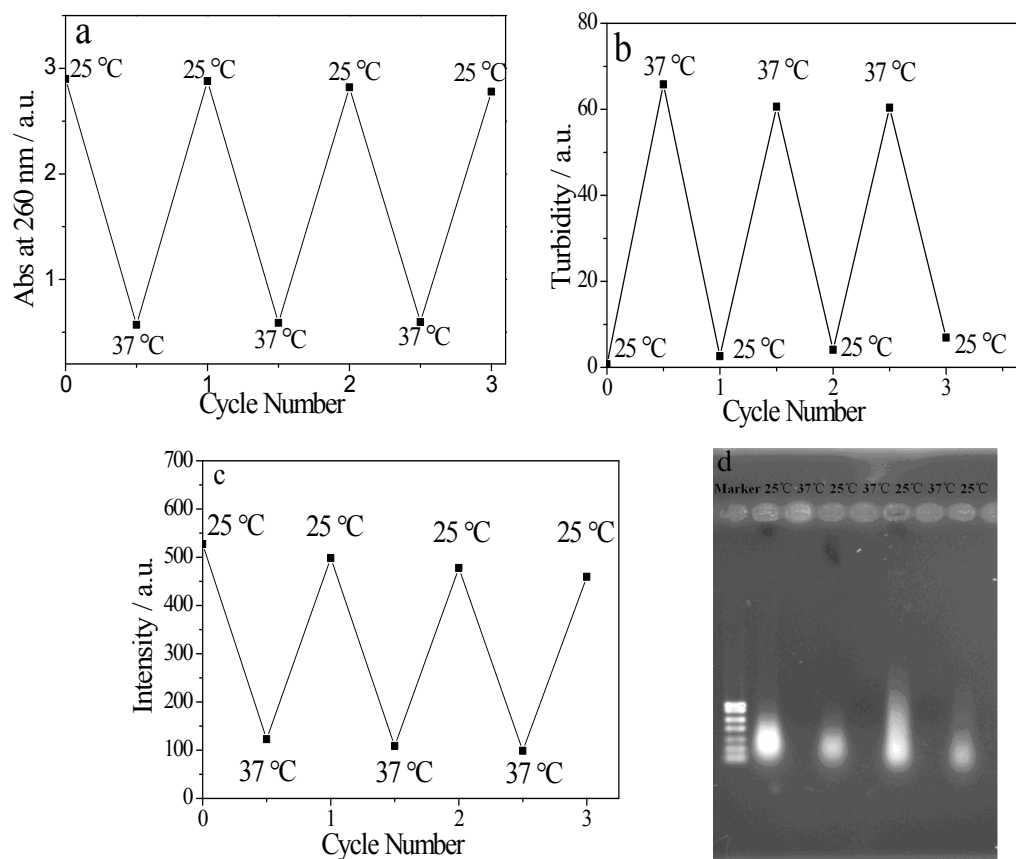

**Figure S4.** Variations of a) UV-vis absorbance, b) turbidity, c) fluorescence intensity (450 nm) and d) gel electrophoresis performance of DNA/C<sub>14</sub>DMAO system at 25 °C and 37 °C as a function of cycle number. The samples were prepared using tris-HCl buffer solutions with pH = 7.2.
